# Supplementary material for: Effectiveness and Safety of Immune Checkpoint Inhibitors for Patients with Advanced Non Small-Cell Lung Cancer in Real-World: Review and Meta-Analysis
Source: Cancers (Basel). 2021 Mar 19;13(6):1388. doi: 10.3390/cancers13061388 (PMC8003199; doi:10.3390/cancers13061388)
Supplement: Supplementary file 1 [file cancers-13-01388-s001.pdf]

**Table 1S:** Role of performance status, age, CNS and liver metastases on studied endpoints evaluated in terms of odds ratio for ORR and DCR and of mean ratio for PFS and OS

| ORR                  | Odds Ratio  | 95% CI    | P-value |
|----------------------|-------------|-----------|---------|
| Performance status   | 0.74        | 0.38-1.45 | 0.365   |
| Age                  | 1.02        | 0.96-1.08 | 0.576   |
| Liver metastases (%) | 0.96        | 0.91-1.02 | 0.215   |
| CNS metastases (%)   | 0.99        | 0.97-1.01 | 0.230   |
|                      |             |           |         |
| DCR                  | Odds Ratio  | 95% CI    | P-value |
| Performance status   | 0.65        | 0.34-1.26 | 0.190   |
| Age                  | 1.02        | 0.96-1.09 | 0.479   |
| Liver metastases (%) | 0.93        | 0.91-0.96 | <0.001  |
| CNS metastases (%)   | 1.00        | 0.98-1.01 | 0.758   |
|                      |             |           |         |
| PFS                  | Means Ratio | 95% CI    | P-value |
| Performance status   | 0.71        | 0.37-1.38 | 0.297   |
| Age                  | 0.98        | 0.92-1.04 | 0.400   |
| Liver metastases (%) | 0.97        | 0.92-1.03 | 0.297   |
| CNS metastases (%)   | 0.98        | 0.96-0.99 | 0.014   |
|                      |             |           |         |
| OS                   | Means Ratio | 95% CI    | P-value |
| Performance status   | 0.75        | 0.45-1.26 | 0.262   |
| Age                  | 1.00        | 0.96-1.05 | 0.939   |
| Liver metastases (%) | 0.97        | 0.91-1.03 | 0.240   |
| CNS metastases (%)   | 0.99        | 0.97-1.01 | 0.287   |

A unitary increase of the percent of patients with liver metastases reduced the occurrence of DCR by 7%, while the unitary increase of percent of patients with CNS metastases reduced median PFS by 2%

**Table 2S:** Risk of bias according to the Study Quality Assessment Tools for case-series studies [66]

| Author                      | Was the study objective clearly stated? | Was the study population clearly described? * | Were the cases consecutive? | Was the intervention clearly described?** | Were the outcome measures clearly defined, valid, reliable? |     |     |     | Was the length of follow-up adequate?*** | Were the statistical methods well-described? | Were the results well-described? | Quality Rating |
|-----------------------------|-----------------------------------------|-----------------------------------------------|-----------------------------|-------------------------------------------|-------------------------------------------------------------|-----|-----|-----|------------------------------------------|----------------------------------------------|----------------------------------|----------------|
|                             |                                         |                                               |                             |                                           | ORR                                                         | DCR | PFS | OS  |                                          |                                              |                                  |                |
| Adachi et al, 2020 (19)     | yes                                     | yes                                           | yes                         | yes                                       | yes                                                         | yes | yes | yes | yes                                      | yes                                          | yes                              | good           |
| Chen et al, 2020 (20)       | yes                                     | no                                            | yes                         | yes                                       | yes                                                         | yes | no  | no  | yes                                      | yes                                          | yes                              | low            |
| Dupont et al, 2020 (21)     | yes                                     | yes                                           | yes                         | yes                                       | yes                                                         | no  | no  | no  | yes                                      | yes                                          | yes                              | good           |
| Figueiredo et al, 2020 (22) | yes                                     | yes                                           | cd                          | yes                                       | yes                                                         | yes | yes | yes | yes                                      | yes                                          | yes                              | good           |
| Joris et al, 2020 (23)      | yes                                     | no                                            | cd                          | yes                                       | yes                                                         | no  | yes | yes | cd                                       | yes                                          | yes                              | low            |
| Martin et al, 2020 (24)     | yes                                     | no                                            | cd                          | no                                        | yes                                                         | yes | no  | no  | cd                                       | yes                                          | yes                              | low            |
| Pantano et al, 2020 (25)    | yes                                     | yes                                           | cd                          | yes                                       | yes                                                         | yes | no  | no  | nr                                       | yes                                          | yes                              | fair           |
| Russo et al, 2020 (26)      | yes                                     | no                                            | cd                          | no                                        | yes                                                         | yes | yes | yes | yes                                      | yes                                          | yes                              | low            |
| Velcheti et al, 2020 (27)   | yes                                     | yes                                           | cd                          | yes                                       | no                                                          | no  | no  | yes | yes                                      | yes                                          | yes                              | good           |
| Kim et al, 2020 (28)        | yes                                     | yes                                           | yes                         | yes                                       | yes                                                         | yes | yes | yes | cd                                       | yes                                          | yes                              | fair           |
| Zhang et al, 2020 (29)      | yes                                     | no                                            | cd                          | yes                                       | yes                                                         | yes | no  | no  | yes                                      | yes                                          | yes                              | low            |
| Baldini et al, 2020 (30)    | yes                                     | yes                                           | yes                         | yes                                       | yes                                                         | yes | yes | yes | yes                                      | yes                                          | yes                              | good           |

\* yes if age, sex, histology, ECOG PS and presence of liver or brain metastases were reported; \*\* yes if ICIs lines were specified; \*\*\* yes if mean/median follow-up or overall survival  $\geq 12$  months; cd: cannot determine; nr: not reported

**Table 2Sa: Risk of bias according to the Study Quality Assessment Tools for case-series studies [66]**

| Author                           | Was the study objective clearly stated? | Was the study population clearly described?* | Were the cases consecutive? | Was the intervention clearly described?** | Were the outcome measures clearly defined, valid, reliable? |     |     |     | Was the length of follow-up adequate?*** | Were the statistical methods well-described? | Were the results well-described? | Quality Rating |
|----------------------------------|-----------------------------------------|----------------------------------------------|-----------------------------|-------------------------------------------|-------------------------------------------------------------|-----|-----|-----|------------------------------------------|----------------------------------------------|----------------------------------|----------------|
|                                  |                                         |                                              |                             |                                           | ORR                                                         | DCR | PFS | OS  |                                          |                                              |                                  |                |
| Crinò et al, 2019 (31)           | yes                                     | yes                                          | cd                          | yes                                       | yes                                                         | yes | yes | yes | cd                                       | yes                                          | yes                              | fair           |
| Fukui et al, 2019 (32)           | yes                                     | yes                                          | yes                         | yes                                       | yes                                                         | yes | yes | no  | yes                                      | yes                                          | yes                              | good           |
| Grossi et al, 2019 (33)          | yes                                     | yes                                          | cd                          | yes                                       | yes                                                         | yes | yes | yes | yes                                      | yes                                          | yes                              | good           |
| Lang et al, 2019 (34)            | yes                                     | yes                                          | yes                         | yes                                       | yes                                                         | yes | yes | yes | yes                                      | yes                                          | yes                              | good           |
| Merino Almazan, et al, 2019 (35) | yes                                     | yes                                          | yes                         | yes                                       | yes                                                         | yes | yes | yes | cd                                       | yes                                          | yes                              | fair           |
| Muchnik et al, 2019 (36)         | yes                                     | no                                           | yes                         | yes                                       | yes                                                         | yes | yes | yes | cd                                       | yes                                          | yes                              | low            |
| Weis et al, 2019 (37)            | yes                                     | no                                           | cd                          | yes                                       | yes                                                         | yes | yes | yes | cd                                       | yes                                          | <b>yes</b>                       | low            |
| Schwartzberg et al, 2019 (38)    | yes                                     | no                                           | cd                          | yes                                       | yes                                                         | no  | no  | yes | cd                                       | yes                                          | yes                              | low            |
| El Karak et al, 2019 (39)        | yes                                     | yes                                          | cd                          | yes                                       | yes                                                         | yes | yes | yes | cd                                       | yes                                          | yes                              | fair           |
| Spigel et al, 2019 (40)          | yes                                     | no                                           | cd                          | yes                                       | no                                                          | no  | no  | yes | cd                                       | yes                                          | yes                              | low            |
| Areses Manrique et al, 2018 (41) | yes                                     | yes                                          | cd                          | yes                                       | yes                                                         | yes | yes | yes | yes                                      | yes                                          | yes                              | good           |
| Garde-Noguera et al, 2018 (42)   | yes                                     | yes                                          | cd                          | yes                                       | yes                                                         | no  | yes | yes | cd                                       | yes                                          | yes                              | fair           |

\* yes if age, sex, histology, ECOG PS and presence of liver or brain metastases were reported; \*\* yes if ICI lines were specified; \*\*\* yes if mean/median follow-up or overall survival  $\geq 12$  months; cd: cannot determine; nr: not reported

**Table 2Sb: Risk of bias according to the Study Quality Assessment Tools for case-series studies [66]**

| Author                     | Was the study objective clearly stated? | Was the study population clearly described?* | Were the cases consecutive? | Was the intervention clearly described?** | Were the outcome measures clearly defined, valid, reliable? |     |     |     | Was the length of follow-up adequate?*** | Were the statistical methods well-described? | Were the results well-described? | Quality Rating |
|----------------------------|-----------------------------------------|----------------------------------------------|-----------------------------|-------------------------------------------|-------------------------------------------------------------|-----|-----|-----|------------------------------------------|----------------------------------------------|----------------------------------|----------------|
|                            |                                         |                                              |                             |                                           | ORR                                                         | DCR | PFS | OS  |                                          |                                              |                                  |                |
| Fujimoto et al, 2018 (43)  | yes                                     | no                                           | cd                          | yes                                       | yes                                                         | yes | no  | no  | yes                                      | yes                                          | yes                              | low            |
| Juergens et al, 2018 (44)  | yes                                     | yes                                          | cd                          | yes                                       | no                                                          | no  | yes | yes | yes                                      | yes                                          | yes                              | good           |
| Kobayashi et al, 2018 (45) | yes                                     | yes                                          | yes                         | yes                                       | yes                                                         | yes | yes | no  | nr                                       | yes                                          | yes                              | fair           |
| Nakaya et al, 2018 (46)    | yes                                     | no                                           | cd                          | yes                                       | yes                                                         | yes | no  | no  | yes                                      | yes                                          | yes                              | low            |
| Tamiya et al, 2018 (47)    | yes                                     | yes                                          | yes                         | yes                                       | yes                                                         | yes | yes | no  | yes                                      | yes                                          | yes                              | good           |
| Toumoy et al, 2018 (48)    | yes                                     | yes                                          | yes                         | yes                                       | yes                                                         | yes | yes | yes | cd                                       | yes                                          | yes                              | fair           |
| Bagley et al, 2017 (49)    | yes                                     | yes                                          | yes                         | yes                                       | yes                                                         | no  | yes | yes | cd                                       | yes                                          | yes                              | fair           |
| Kobayashi et al, 2017 (51) | yes                                     | no                                           | cd                          | yes                                       | yes                                                         | yes | no  | no  | nr                                       | yes                                          | yes                              | low            |

\* yes if age, sex, histology, ECOG PS and presence of liver or brain metastases were reported; \*\* yes if ICIs lines were specified; \*\*\* yes if mean/median follow-up or overall survival  $\geq 12$  months; cd: cannot determine; nr: not reported
